# Supplementary material for: Overall and Sex-Specific Associations Between Fetal Adversity and Child Development at Age 1 Year: Evidence From Brazil
Source: PubMed Central journal article supplement — Am J Epidemiol. 2018 Jul 2;187(11):2324–31. doi: 10.1093/aje/kwy141 (PMC6211242; doi:10.1093/aje/kwy141), 2018-07-02
Supplement: kwy141_fink_web_material_final.pdf [file kwy141_fink_web_material_final.pdf]

## **Web Material**

### **Overall and Sex-specific Associations between Fetal Adversity and Child Development at One Year: Evidence from Brazil**

Günther Fink, Kathryn G. Andrews, Helena Brentani, Sandra Grisi, Ana Paula Scoleze Ferrer, and Alexandra Brentani

#### **Contents:**

Web Table 1

Web Table 2

**Web Table 1.** Sex-specific Associations between Prematurity, SGA and Child Development using INTERGROWTH Standards

|                           | Outcome variable <sup>a</sup> |                                    |                     |                                    |                     |                                            |
|---------------------------|-------------------------------|------------------------------------|---------------------|------------------------------------|---------------------|--------------------------------------------|
|                           | Coefficient                   | HAZ<br>95% confidence<br>intervals | Coefficient         | WAZ<br>95% confidence<br>intervals | Coefficient         | ASQ z-score<br>95% confidence<br>intervals |
| <b>Females</b>            |                               |                                    |                     |                                    |                     |                                            |
| Small for gestational age | -0.774 <sup>b</sup>           | (-1.098, -0.450)                   | -0.546 <sup>b</sup> | (-0.827, -0.266)                   | 0.044               | (-0.250, 0.338)                            |
| Preterm birth             | 0.048                         | (-0.389, 0.485)                    | 0.107               | (-0.242, 0.457)                    | -0.360              | (-0.792, 0.073)                            |
| <b>Males</b>              |                               |                                    |                     |                                    |                     |                                            |
| Small for gestational age | -1.330 <sup>b</sup>           | (-1.930, -0.730)                   | -0.990 <sup>b</sup> | (-1.468, -0.511)                   | -0.097              | (-0.504, 0.311)                            |
| Preterm birth             | 0.338                         | (-0.213, 0.888)                    | 0.318               | (-0.175, 0.811)                    | -0.327 <sup>c</sup> | (-0.658, 0.003)                            |

Abbreviations: SGA, small for gestational age; HAZ, height-for-age z-score; WAZ, weight-for-age z-score; ASQ, Ages and Stages Questionnaire

Notes: <sup>a</sup>All models include controls for child sex, child age in months, caregiver education, Multiple Indicator Cluster Survey home activity score, assessor home score and asset quintiles. The 95% confidence intervals in parentheses are based on heteroscedasticity-robust standard errors. P-values based on a pooled model with linear interaction terms.

<sup>b</sup>p<0.01, <sup>c</sup>p<0.1

**Web Table 2.** Sex-specific Associations between Prematurity, SGA and Child Development using Oken Standards

|                           | Outcome variable <sup>a</sup> |                                    |                     |                                    |                     |                                            |
|---------------------------|-------------------------------|------------------------------------|---------------------|------------------------------------|---------------------|--------------------------------------------|
|                           | Coefficient                   | HAZ<br>95% confidence<br>intervals | Coefficient         | WAZ<br>95% confidence<br>intervals | Coefficient         | ASQ z-score<br>95% confidence<br>intervals |
| <b>Females</b>            |                               |                                    |                     |                                    |                     |                                            |
| Small for gestational age | -0.602 <sup>b</sup>           | (-0.900, -0.304)                   | -0.539 <sup>b</sup> | (-0.809, -0.269)                   | 0.170               | (-0.093, 0.433)                            |
| Preterm birth             | -0.031                        | (-0.428, 0.366)                    | 0.119               | (-0.202, 0.439)                    | -0.509 <sup>c</sup> | (-1.000, -0.017)                           |
| <b>Males</b>              |                               |                                    |                     |                                    |                     |                                            |
| Small for gestational age | -1.238 <sup>b</sup>           | (-1.696, -0.781)                   | -1.010 <sup>b</sup> | (-1.500, -0.521)                   | -0.125              | (-0.478, 0.228)                            |
| Preterm birth             | 0.365                         | (-0.164, 0.894)                    | 0.312               | (-0.174, 0.799)                    | -0.345 <sup>c</sup> | (-0.675, -0.016)                           |

Abbreviations: SGA, small for gestational age; HAZ, height-for-age z-score; WAZ, weight-for-age z-score; ASQ, Ages and Stages Questionnaire

Notes: <sup>a</sup>All models include controls for child sex, child age in months, caregiver education, Multiple Indicator Cluster Survey home activity score, assessor home score and asset quintiles. The 95% confidence intervals in parentheses are based on heteroscedasticity-robust standard errors. P-values based on a pooled model with linear interaction terms.

<sup>b</sup>p<0.01, <sup>c</sup>p<0.05
